# Supplementary material
Source: MDPI journal article supplement (https://www.mdpi.com/2312-7481/6/4/45)
Supplement: s1 [file s1]

## **Slow Magnetic Relaxation in a One-Dimensional Coordination Polymer Constructed from Hepta-coordinate Cobalt(II) Nodes**

**Amit Kumar Mondal<sup>1,2,\*</sup>, Arpan Mondal<sup>1</sup> and Sanjit Konar<sup>1,\*</sup>**

<sup>1</sup> *Department of Chemistry, Indian Institute of Science Education and Research Bhopal, Bhopal Bypass Road, Bhauri, Bhopal 462066, Madhya Pradesh, India.*

<sup>2</sup> *Present address: Department of Chemical and Biological Physics, Weizmann Institute of Science, Rehovot 76100, Israel.*

*Corresponding author's email: amit.iiserb@gmail.com (A.K.M.) and skonar@iiserb.ac.in (S.K.)*

**Table S1.** X-ray Crystallographic Data and Refinement Parameters for complex **1**.

| <b>1</b>                                 |                                                                 |
|------------------------------------------|-----------------------------------------------------------------|
| Formula                                  | C <sub>29</sub> H <sub>31</sub> CoN <sub>9</sub> O <sub>6</sub> |
| M <sub>w</sub> (g mol <sup>-1</sup> )    | 660.56                                                          |
| Crystal size (mm)                        | 0.45×0.18×0.16                                                  |
| Crystal system                           | Orthorhombic                                                    |
| Space group                              | <i>Pbca</i>                                                     |
| T (K)                                    | 293(2)                                                          |
| a (Å)                                    | 19.6105(6)                                                      |
| b (Å)                                    | 15.8275(5)                                                      |
| c (Å)                                    | 20.3903(6)                                                      |
| α (°)                                    | 90                                                              |
| β (°)                                    | 90                                                              |
| γ (°)                                    | 90                                                              |
| V (Å <sup>3</sup> )                      | 6328.9(3)                                                       |
| Z                                        | 8                                                               |
| ρ <sub>calcd</sub> (g cm <sup>-3</sup> ) | 1.387                                                           |
| μ(MoKα) (mm <sup>-1</sup> )              | 0.598                                                           |
| <i>F</i> (000)                           | 2744.0                                                          |
| T <sub>max</sub> , T <sub>min</sub>      | 0.919, 0.869                                                    |
| h, k, l range                            | -26 ≤ <i>h</i> ≤ 26, -21 ≤ <i>k</i> ≤ 21, -27 ≤ <i>l</i> ≤ 27   |
| Collected reflections                    | 7676                                                            |
| Independent reflections                  | 5767                                                            |
| Goodness-of-fit (GOF) on F <sup>2</sup>  | 1.095                                                           |
| R1, wR2 ( <i>I</i> > 2σ <i>I</i> )       | 0.0607, 0.1813                                                  |

|                                                                                                     |                |
|-----------------------------------------------------------------------------------------------------|----------------|
| R1, wR2 (all data)                                                                                  | 0.0812, 0.1970 |
| CCDC Number                                                                                         | 1487267        |
| $R1 = \Sigma  Fo  -  Fc  /\Sigma Fo $ and $wR2 =  \Sigma w( Fo ^2 -  Fc ^2) /\Sigma w(Fo)^2 ^{1/2}$ |                |

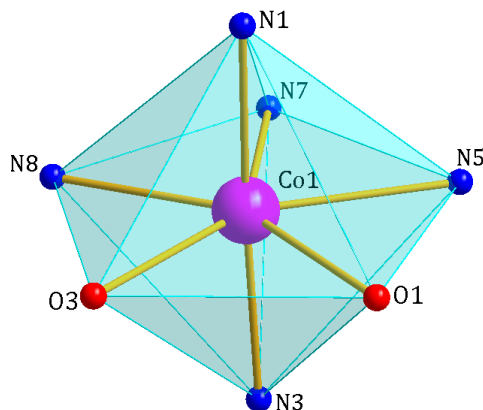

**Figure S1.** Distorted pentagonal bipyramid coordination geometry around the Co<sup>II</sup> center in **1**.

**Table S2.** Summary of SHAPE analysis for complex **1**.

|         |   |                 |                                         |
|---------|---|-----------------|-----------------------------------------|
| HP-7    | 1 | D <sub>7h</sub> | Heptagon                                |
| HPY-7   | 2 | C <sub>6v</sub> | Hexagonal pyramid                       |
| PBPY-7  | 3 | D <sub>5h</sub> | Pentagonal bipyramid                    |
| COC-7   | 4 | C <sub>3v</sub> | Capped octahedron                       |
| CTPR-7  | 5 | C <sub>2v</sub> | Capped trigonal prism                   |
| JPBPY-7 | 6 | D <sub>5h</sub> | Johnson pentagonal bipyramid J13        |
| JETPY-7 | 7 | C <sub>3v</sub> | Johnson elongated triangular pyramid J7 |

| Structure [ML <sub>7</sub> ] | HP-7   | HPY-7  | PBPY-7       | COC-7 | CTPR-7 | JPBPY-7 | JETPY-7 |
|------------------------------|--------|--------|--------------|-------|--------|---------|---------|
| Complex <b>1</b>             | 33.909 | 23.175 | <b>0.244</b> | 7.271 | 5.752  | 2.952   | 23.537  |

**Table S3.** Bond distances (Å) and bond angles (°) around Co<sup>II</sup> center found in complex **1**.

| Bond distance (Å) |        |           | Bond angle (°)   |           |           |
|-------------------|--------|-----------|------------------|-----------|-----------|
| Complex <b>1</b>  |        |           | Complex <b>1</b> |           |           |
|                   | Co1—O1 | 2.2315(1) |                  | O1—Co1—O3 | 76.82(5)  |
|                   | Co1—O3 | 2.1897(1) |                  | O1—Co1—N1 | 87.80(5)  |
|                   | Co1—N1 | 2.0829(1) |                  | O1—Co1—N5 | 70.62(5)  |
|                   | Co1—N5 | 2.2149(1) |                  | O1—Co1—N7 | 139.44(5) |
|                   | Co1—N7 | 2.2035(1) |                  | O1—Co1—N8 | 149.21(5) |
|                   | Co1—N8 | 2.1408(1) |                  | O1—Co1—N3 | 85.51(5)  |
|                   | Co1—N3 | 2.0813(1) |                  | O3—Co1—N1 | 89.61(5)  |
|                   |        |           |                  | O3—Co1—N5 | 147.38(5) |
|                   |        |           |                  | O3—Co1—N7 | 143.73(6) |
|                   |        |           |                  | O3—Co1—N8 | 72.40(6)  |
|                   |        |           |                  | O3—Co1—N3 | 87.57(6)  |
|                   |        |           |                  | N1—Co1—N5 | 91.11(6)  |
|                   |        |           |                  | N1—Co1—N7 | 92.04(6)  |
|                   |        |           |                  | N1—Co1—N8 | 92.80(6)  |

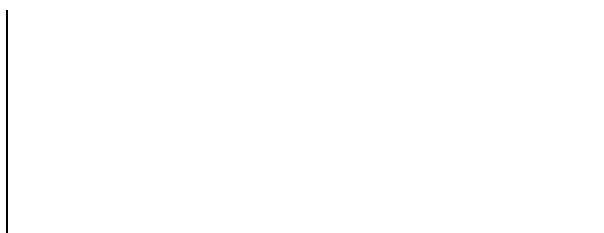

|           |           |
|-----------|-----------|
| N1—Co1—N3 | 173.18(6) |
| N5—Co1—N7 | 68.84(6)  |
| N5—Co1—N8 | 140.08(6) |
| N5—Co1—N3 | 87.93(6)  |
| N7—Co1—N8 | 71.33(5)  |
| N7—Co1—N3 | 93.91(5)  |
| N8—Co1—N3 | 92.27(5)  |

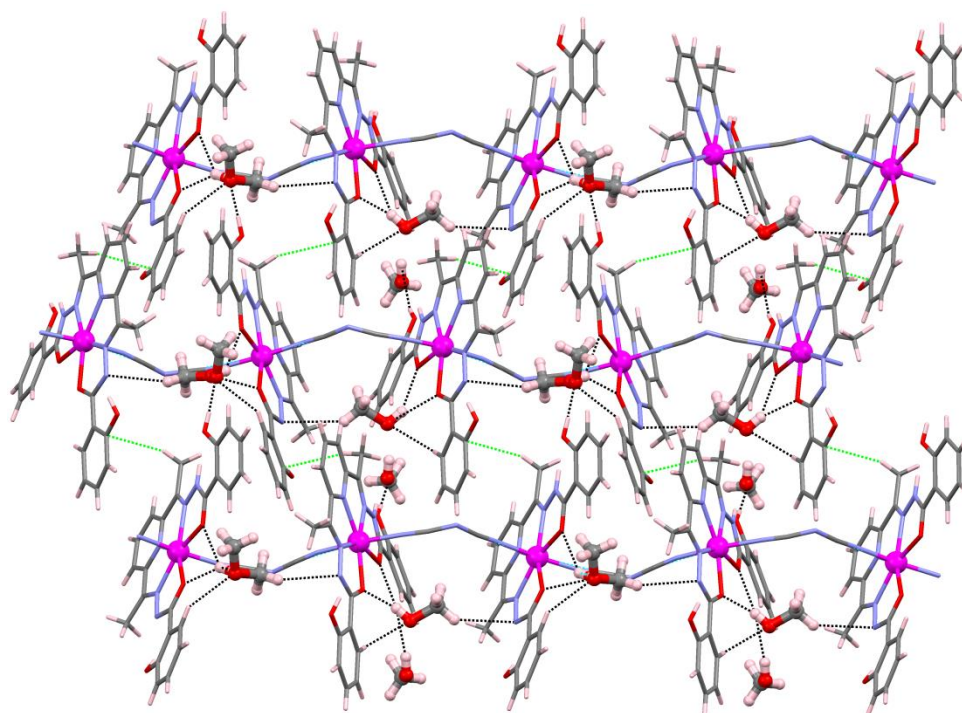

**Figure S2.** A view of supramolecular 2D arrangement of complex **1** through intermolecular H-bonding and CH $\cdots$  $\pi$  interactions.

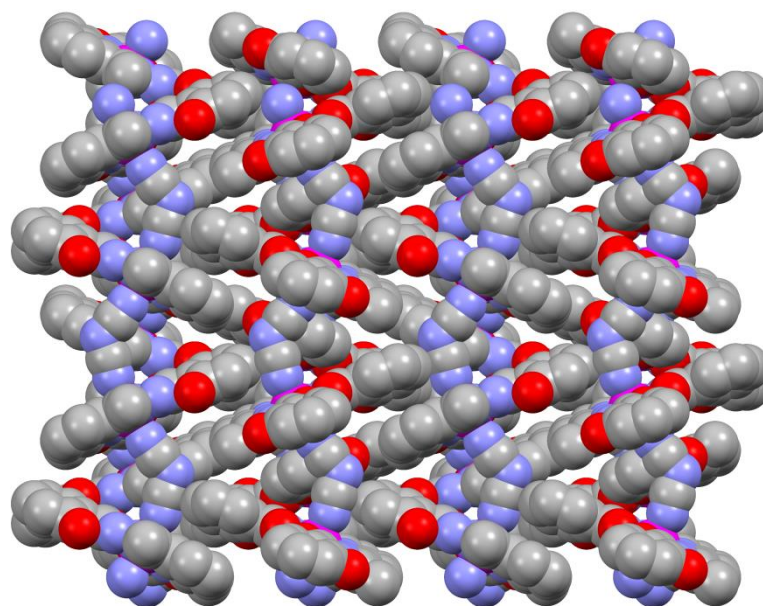

**Figure S3.** A view of de-solvated framework of **1** emphasizing the supramolecular interactions.

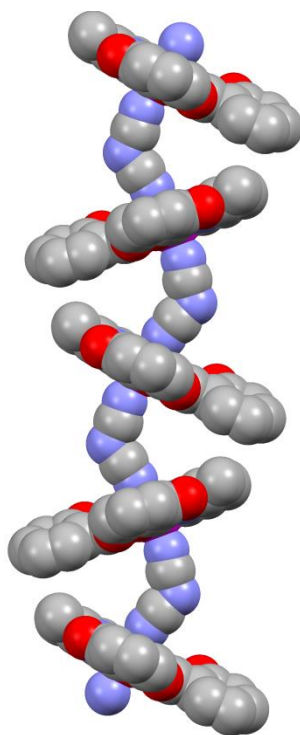

**Figure S4.** Helical 1D arrangement of complex **1** along the *c* axis.

**Table S4.** H-bond parameters found in complex **1**.

| D—H $\cdots$ A        | D—H(Å) | H $\cdots$ A(Å) | D $\cdots$ A (Å) | <D—H—A(°) | Symmetry <sup>#</sup> |
|-----------------------|--------|-----------------|------------------|-----------|-----------------------|
| O5—H5 $\cdots$ O1     | 0.82   | 2.39            | 3.070(4)         | 141       | 0                     |
| O5—H5 $\cdots$ O3     | 0.82   | 2.14            | 2.834(4)         | 143       | 0                     |
| C54—H54A $\cdots$ O3  | 0.96   | 2.51            | 3.395(6)         | 154       | 0                     |
| O2—H2 $\cdots$ O32A   | 0.82   | 1.76            | 2.550(4)         | 162       | 1                     |
| C2—H2A $\cdots$ N4    | 0.93   | 2.48            | 3.397(7)         | 168       | 2                     |
| O32A—H32A $\cdots$ O5 | 0.82   | 1.87            | 2.668(4)         | 165       | 3                     |

<sup>#</sup> (0) *x*,*y*,*z*; (1) 1/2+*x*,*y*,1/2-*z*; (2) 1/2-*x*,1-*y*,-1/2+*z*; (3) -1/2+*x*,1/2-*y*,1-*z*.

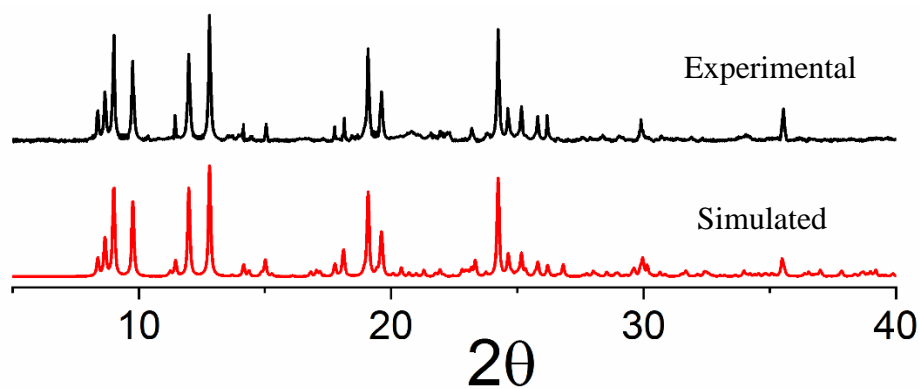

**Figure S5.** PXRD for complex **1**.

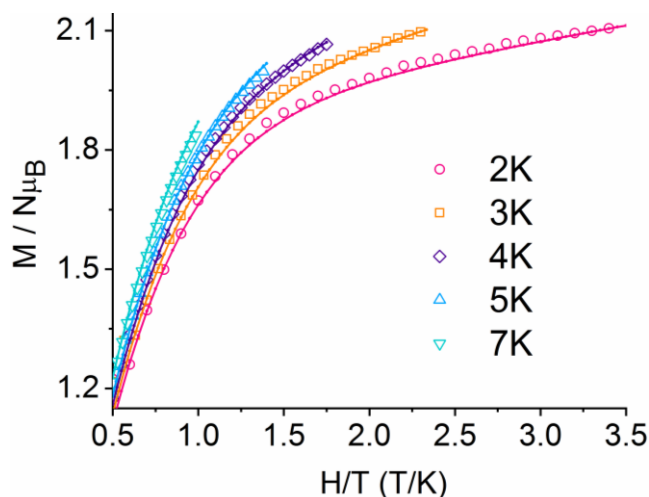

**Figure S6.**  $M/N\mu_B$  vs.  $H/T$  plots at the indicated temperatures for complex **1**. The solid lines are the best fit.

**Table S5.** Magnetic anisotropy ( $D$  parameters) and SIM parameters for previously reported seven-coordinated  $\text{Co}^{\text{II}}$  SIMs in the literature.

| Complex                                                                                                | $D$ ( $\text{cm}^{-1}$ ) | $\tau_0$ (s)          | $U_{\text{eff}}$ (K) | Ref.       |
|--------------------------------------------------------------------------------------------------------|--------------------------|-----------------------|----------------------|------------|
| $[\text{Co}(\text{dapbhH}_2)(\text{H}_2\text{O})(\text{NO}_3)](\text{NO}_3)$                           | 32.4                     | $6.0 \times 10^{-10}$ | 81.2                 | 1, 2       |
| $[\text{CoL}_{\text{N5}}(\text{H}_2\text{O})_2]\text{Cl}_2 \cdot 4\text{H}_2\text{O}$                  | 24.6                     | $1.2 \times 10^{-6}$  | 29.8                 | 2          |
| $[\text{Co}(\text{dapbhH}_2)(\text{im})_2] \cdot \text{H}_2\text{O}$                                   | 24.8                     | $8.7 \times 10^{-11}$ | 89.6                 | 2          |
| $[\text{Co}(\text{dapbhH}_2)\text{I}(\text{NO}_3)]\text{I}$                                            | 30                       | nr                    | nr                   | 3          |
| $[\text{Co}(\text{dapbhH}_2)\text{Br}(\text{NO}_3)]\text{Br}$                                          | 30                       | nr                    | nr                   | 3          |
| $[\text{Co}(\text{L}_1)\text{Cl}_2]$                                                                   | 40                       | nr                    | nr                   | 4          |
| $[\text{Co}(\text{L}_2)](\text{ClO}_4)_2$                                                              | 26                       | nr                    | nr                   | 5          |
| $[\text{Co}(\text{L}_2)](\text{NO}_3)_2$                                                               | 25                       | nr                    | nr                   | 5          |
| $[\text{Co}(\text{dapbhH}_2)(\text{SCN})_2]$                                                           | 15.9                     | nr                    | nr                   | 6          |
| $[\text{Co}(\text{dapbh})(\text{H}_2\text{O})_2]$                                                      | 13.1                     | nr                    | nr                   | 6          |
| $[\text{Co}(\text{L})\text{Cl}_2] \cdot 2\text{CH}_3\text{OH}$                                         | 38                       | $1.1 \times 10^{-5}$  | 7.9                  | 7          |
| $[\text{Co}(\text{L})\text{Br}_2]$                                                                     | 41                       | $1.1 \times 10^{-5}$  | 6.1                  | 7          |
| $[\text{Co}(\text{L})\text{I}_2]$                                                                      | 35                       | $1.1 \times 10^{-5}$  | 6.5                  | 7          |
| $[\text{Co}(\text{tdmmb})(\text{H}_2\text{O})_2][\text{BF}_4]_2$                                       | 25.6                     | $1.1 \times 10^{-6}$  | 42.2                 | 8          |
| $[\text{Co}(\text{tdmmb})(\text{CN})_2] \cdot 2\text{H}_2\text{O}$                                     | 17.4                     | $3.2 \times 10^{-7}$  | 48.9                 | 8          |
| $[\text{Co}(\text{tdmmb})(\text{NCS})_2]$                                                              | 26.3                     | $1.0 \times 10^{-6}$  | 49.2                 | 8          |
| $[\text{Co}(\text{tdmmb})(\text{SPh})_2]$                                                              | 34.5                     | $2.1 \times 10^{-7}$  | 54.7                 | 8          |
| $[\text{Co}(\text{4-tert-butylpyridine})_3(\text{NO}_3)_2]$                                            | 35.8                     | $3.7 \times 10^{-9}$  | 52.6                 | 9          |
| $[\text{Co}(\text{isoquinoline})_3(\text{NO}_3)_2]$                                                    | 35.7                     | $9.1 \times 10^{-8}$  | 28.8                 | 9          |
| $[(\text{OTfpy})\text{Co}(\kappa_2\text{-O}_2\text{NO})_2]$                                            | -41.4                    | nr                    | nr                   | 10         |
| $[\text{Co}(\text{H}_2\text{daps})(\text{MeOH})_2]$                                                    | 43.1                     | $7.4 \times 10^{-6}$  | 33.5                 | 11         |
| $[\text{Co}(\text{H}_4\text{daps})(\text{NCS})(\text{MeOH})] \cdot (\text{ClO}_4) \cdot (\text{MeOH})$ | 41.5                     | $5.6 \times 10^{-6}$  | 28.4                 | 11         |
| $[\text{Co}(\text{H}_4\text{daps})(\text{NCS})_2] \cdot (\text{MeOH})_2$                               | 38.8                     | $4.8 \times 10^{-6}$  | 23.6                 | 11         |
| $[\text{Co}(\text{-DAPBH})(\text{NO}_3)(\text{H}_2\text{O})](\text{NO}_3)$                             | 30                       | nr                    | 50                   | 12         |
| $[\text{Co}(\text{H}_4\text{L})(\text{DMF})(\text{H}_2\text{O})](\text{NO}_3)_2 \cdot (\text{DMF})$    | 35.9                     | $6.5 \times 10^{-6}$  | 25                   | 13         |
| $[\text{Co}(\text{H}_4\text{L})(\text{MeOH})(\text{H}_2\text{O})](\text{NO}_3)_2 \cdot (\text{MeOH})$  | 37.2                     | $3.5 \times 10^{-6}$  | 15                   | 13         |
| $[\text{Co}(\text{H}_4\text{L})(\text{DEF})(\text{H}_2\text{O})](\text{NO}_3)_2$                       | 43.7                     | $1.9 \times 10^{-6}$  | 4                    | 13         |
| $[\text{Co}(\text{H}_3\text{daps})(\text{dca})] \cdot (\text{MeOH})_2 \cdot (\text{MeCN})$             | 41.3                     | $5.3 \times 10^{-6}$  | 9.9                  | This paper |

nr = not reported.

**Table S6.** Ab initio calculated energies (cm<sup>-1</sup>) of the lowest states ( $S = 3/2$ ) of complex **1**.

| spin-free states | Spin-orbit states |
|------------------|-------------------|
| 0.000            | 0.000             |
| 2667.229         | 0.000             |
| 2917.222         | 88.169            |
| 4420.566         | 88.169            |
| 5045.421         | 2189.501          |
| 11036.401        | 2189.501          |
| 12350.207        | 2662.497          |
| 16705.986        | 2662.497          |
| 17772.836        | 3175.830          |
| 19500.981        | 3175.830          |
|                  | 3529.968          |
|                  | 3529.968          |

**Table S7.** Ab initio calculated magnetic anisotropy in the ground state and first excited state (w.r.t.  $\hat{s} = 1/2$ ) for complex **1**.

| Ground state | First excited state |
|--------------|---------------------|
| $g_x = 5.21$ | $g_x = 0.37$        |
| $g_y = 4.37$ | $g_y = 0.37$        |
| $g_z = 1.97$ | $g_z = 5.96$        |

**Table S8.** Energy of the first four excited states (cm<sup>-1</sup>) and their contribution to the  $D$  and  $E$  values in cm<sup>-1</sup> at CAS(7,5) NEVPT2 level by ORCA.

| State | Mult | Complex <b>1</b> |        |        |
|-------|------|------------------|--------|--------|
|       |      | Energy           | $D$    | $E$    |
| 1st   | 4    | 3663.5           | 2.955  | -0.454 |
| 2nd   | 4    | 4049.8           | 0.868  | 0.385  |
| 3rd   | 4    | 5839.4           | 13.713 | 11.159 |
| 4th   | 4    | 6652.6           | 11.105 | -9.458 |

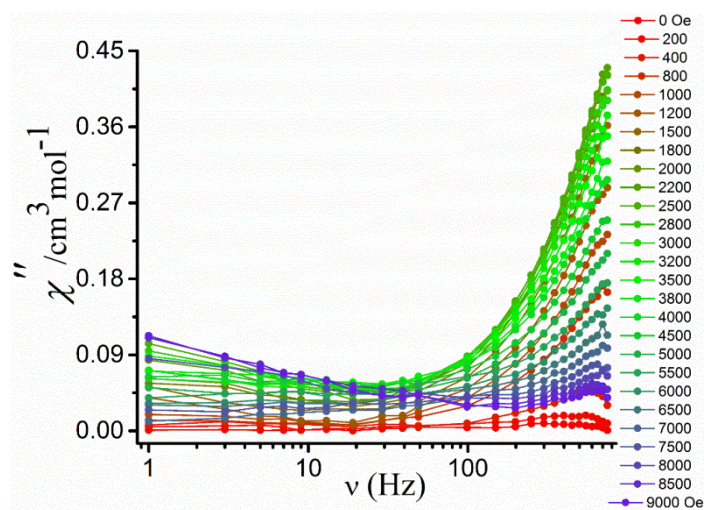

**Figure S7.** Frequency dependency of out-of-phase susceptibility at different external magnetic field (0-0.9 T) and 2 K temperature.



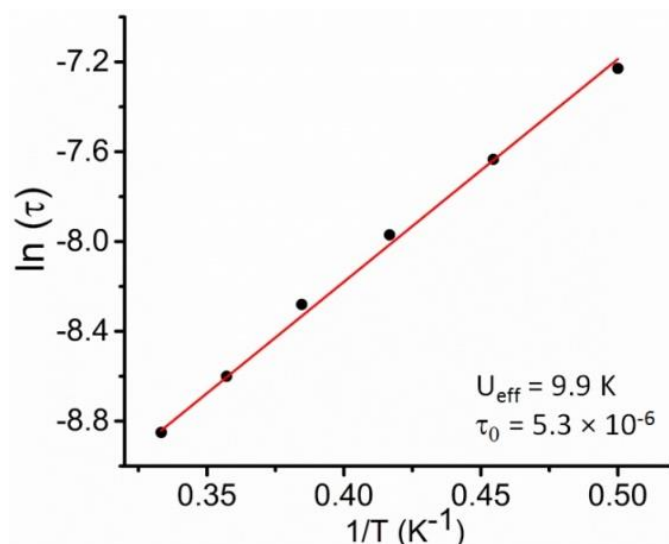

**Figure S8.**  $\ln(\tau)$  vs  $1/T$  plot for complex **1**.

## References:

1. Ruamps, R.; Batchelor, L.J.; Maurice, R.; Gogoi, N.; Jiménez-Lozano, P.; Guihéry, N.; de Graaf, C.; Barra, A.L.; Sutter, J.-P.; Mallah, T. Origin of the Magnetic Anisotropy in Heptacoordinate Ni<sup>II</sup> and Co<sup>II</sup> Complexes. *Chem. - Eur. J.* **2013**, *19*, 950 [DOI: 10.1002/chem.201202492].
2. Huang, X.-C.; Zhou, C.; Shao, D.; Wang, X.-Y. Field-Induced Slow Magnetic Relaxation in Cobalt(II) Compounds with Pentagonal Bipyramid Geometry. *Inorg. Chem.* **2014**, *53*, 12671 [DOI: 10.1021/ic502006s].
3. Batchelor, L.J.; Sangalli, M.; Guillot, R.; Guihéry, N.; Maurice, R.; Tuna, F.; Mallah, T. Pentanuclear Cyanide-Bridged Complexes Based on Highly Anisotropic Co<sup>II</sup> Seven-Coordinate Building Blocks: Synthesis, Structure, and Magnetic Behavior. *Inorg. Chem.* **2011**, *50*, 12045 [DOI: <https://doi.org/10.1021/ic201534e>].
4. Drahoš, B.; Herchel, R.; Travniček, Z. Structural, Magnetic, and Redox Diversity of First-Row Transition Metal Complexes of a Pyridine-Based Macrocyclic: Well-Marked Trends Supported by Theoretical DFT Calculations. *Inorg. Chem.* **2015**, *54*, 3352 [DOI: <https://doi.org/10.1021/ic503054m>].
5. Platas-Iglesias, C.; Vaiana, L.; Esteban-Gómez, D.; Avecilla, F.; Real, J.A.; de Blas, A.; Rodríguez-Blas, T. Electronic Structure Study of Seven-Coordinate First-Row Transition Metal Complexes Derived from 1,10-Diaza-15-crown-5: A Successful Marriage of Theory with Experiment. *Inorg. Chem.* **2005**, *44*, 9704 [DOI: <https://doi.org/10.1021/ic051119h>].
6. Dey, M.; Dutta, S.; Sarma, B.; Deka, R.C.; Gogoi, N. Modulation of Coordination Environment: A Convenient Approach to Tailor Magnetic Anisotropy in Seven Coordinate Co(II) Complexes. *Chem. Commun.* **2016**, *52*, 753 [DOI: 10.1039/C5CC07397A].
7. Drahoš, B.; Herchel, R.; Travniček, Z. Impact of Halogenido Coligands on Magnetic Anisotropy in Seven-Coordinate Co(II) Complexes. *Inorg. Chem.* **2017**, *56*, 5076 [DOI: 10.1021/acs.inorgchem.7b00235].
8. Shao, D.; Zhang, S.-L.; Shi, L.; Zhang, Y.-Q.; Wang, X.-Y. Probing the Effect of Axial Ligands on Easy-Plane Anisotropy of Pentagonal-Bipyramidal Cobalt(II) Single-Ion Magnets. *Inorg. Chem.* **2016**, *55*, 10859 [DOI: 10.1021/acs.inorgchem.6b00854].
9. Chen, L.; Chen, S.-Y.; Sun, Y.-C.; Guo, Y.-M.; Yu, L.; Chen, X.-T.; Wang, Z.; Ouyang, Z. W.; Song, Y.; Xue, Z.-L. Slow magnetic relaxation in mononuclear seven-coordinate cobalt(II) complexes with easy plane anisotropy. *Dalton Trans.* **2015**, *44*, 11482 [DOI: 10.1039/c5dt00785b].

10. Higgins, R.F.; Livesay, B.N.; Ozumerzifon, T.J.; Joyce, J.P.; Rappé, A.K.; Shores, M.P. A family of related Co(II) terpyridine compounds exhibiting field induced single-molecule magnet properties. *Polyhedron* **2018**, *143*, 193 [DOI: <https://doi.org/10.1016/j.poly.2017.10.008>].
11. Mondal, A.K.; Mondal, A.; Dey, B.; Konar, S. Influence of the Coordination Environment on Easy-Plane Magnetic Anisotropy of Pentagonal Bipyramidal Cobalt(II) Complexes. *Inorg. Chem.* **2018**, *57*, 9999 [DOI: 10.1021/acs.inorgchem.8b01162].
12. Habib, F.; Korobkov, I.; Murugesu, M. Exposing the intermolecular nature of the second relaxation pathway in a mononuclear cobalt(II) single-molecule magnet with positive anisotropy. *Dalton Trans.* **2015**, *44*, 6368 [DOI: 10.1039/c5dt00258c].
13. Mondal, A.; Kharwar, A.K.; Konar, S. Sizeable Effect of Lattice Solvent on Field Induced Slow Magnetic Relaxation in Seven Coordinated Co<sup>II</sup> Complexes. *Inorg. Chem.* **2019**, *58*, 10686 [DOI: 10.1021/acs.inorgchem.9b00615].
